# Supplementary material
Source: publisher site journal article supplement (https://www.dovepress.com/article/376750)
Supplement: Supplementary file 1 [file get_supplementary_file.php]

***Figures and Tables Supporting Materials:***

**
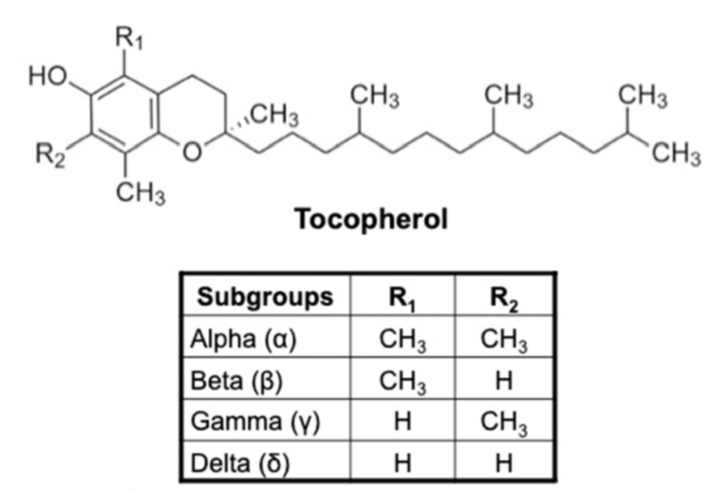
**

**Figure 1S.** Vitamin E

**Table 1S.** Tested Almond Oil formulations (in bold formulation in the homogeneous region, Figure 2S)

| **Sample** | **Almond Oil**  **(g)** | **Tw80**  **(g)** | **Hepes**  **(g)** | **Almond oil (% w/w)** | **Tw80**  **(% w/w)** | **Hepes**  **(% w/w)** |
| --- | --- | --- | --- | --- | --- | --- |
| **A1** | **0.098** | **0.098** | **5.000** | **2.00** | **2.00** | **96.00** |
| **A2** | **0.050** | **0.100** | **10.000** | **0.50** | **1.00** | **98.50** |
| **A3** | **0.100** | **0.100** | **10.000** | **1.00** | **1.00** | **98.00** |
| **A4** | **0.050** | **0.100** | **5.000** | **1.00** | **2.00** | **97.00** |
| **A5** | **0.050** | **0.100** | **3.000** | **2.00** | **3.00** | **95.00** |
| **A6** | **0.100** | **0.050** | **5.000** | **2.00** | **1.00** | **97.00** |
| **A7** | **0.065** | **0.190** | **3.000** | **2.00** | **6.00** | **92.00** |
| **A8** | **0.020** | **0.430** | **0.550** | **2.00** | **43.00** | **55.00** |
| **A9** | **0.100** | **0.050** | **3.000** | **3.00** | **2.00** | **95.00** |
| **A10** | **0.100** | **0.100** | **3.000** | **3.00** | **3.00** | **94.00** |
| **A11** | **0.030** | **0.570** | **0.400** | **3.00** | **57.00** | **40.00** |
| **A12** | **0.050** | **0.100** | **1.000** | **4.00** | **9.00** | **87.00** |
| **A13** | **0.050** | **0.400** | **0.500** | **5.00** | **45.00** | **50.00** |
| **A14** | **0.050** | **0.300** | **0.650** | **5.00** | **30.00** | **65.00** |
| **A15** | **0.100** | **0.100** | **1.000** | **8.00** | **8.00** | **84.00** |
| **A16** | **0.100** | **0.050** | **1.000** | **9.00** | **4.00** | **87.00** |
| **A17** | **0.050** | **0.100** | **0.500** | **8.00** | **15.00** | **77.00** |
| **A18** | **0.125** | **0.050** | **0.325** | **25.00** | **10.00** | **65.00** |
| **A19** | **0.130** | **0.020** | **0.300** | **29.00** | **5.00** | **66.00** |
| **A20** | **0.139** | **0.010** | **0.300** | **31.00** | **3.00** | **66.00** |
| A21 | 0.100 | 0.500 | 0.400 | 10.00 | 50.00 | 40.00 |
| A22 | 0.100 | 0.050 | 0.335 | 11.00 | 22.00 | 67.00 |
| A23 | 0.150 | 0.250 | 0.600 | 15.00 | 25.00 | 60.00 |
| A24 | 0.050 | 0.100 | 0.150 | 17.00 | 33.00 | 50.00 |
| A25 | 0.200 | 0.300 | 0.500 | 20.00 | 30.00 | 50.00 |
| A26 | 0.220 | 0.110 | 0.670 | 22.00 | 11.00 | 67.00 |
| A27 | 0.350 | 0.050 | 0.600 | 35.00 | 5.00 | 60.00 |
| A28 | 0.100 | 0.200 | 0.200 | 20.00 | 40.00 | 40.00 |
| A29 | 0.100 | 0.100 | 0.300 | 20.00 | 20.00 | 60.00 |
| A30 | 0.050 | 0.100 | 0.050 | 25.00 | 50.00 | 25.00 |
| A31 | 0.100 | 0.050 | 0.150 | 33.00 | 17.00 | 50.00 |
| A32 | 0.300 | 0.300 | 0.300 | 34.00 | 33.00 | 33.00 |
| A33 | 0.200 | 0.150 | 0.150 | 40.00 | 30.00 | 30.00 |
| A34 | 0.400 | 0.100 | 0.500 | 40.00 | 10.00 | 50.00 |
| A35 | 0.100 | 0.050 | 0.050 | 50.00 | 25.00 | 25.00 |
| A36 | 0.500 | 0.400 | 0.100 | 50.00 | 40.00 | 10.00 |
| A37 | 0.300 | 0.100 | 0.100 | 60.00 | 20.00 | 20.00 |

**
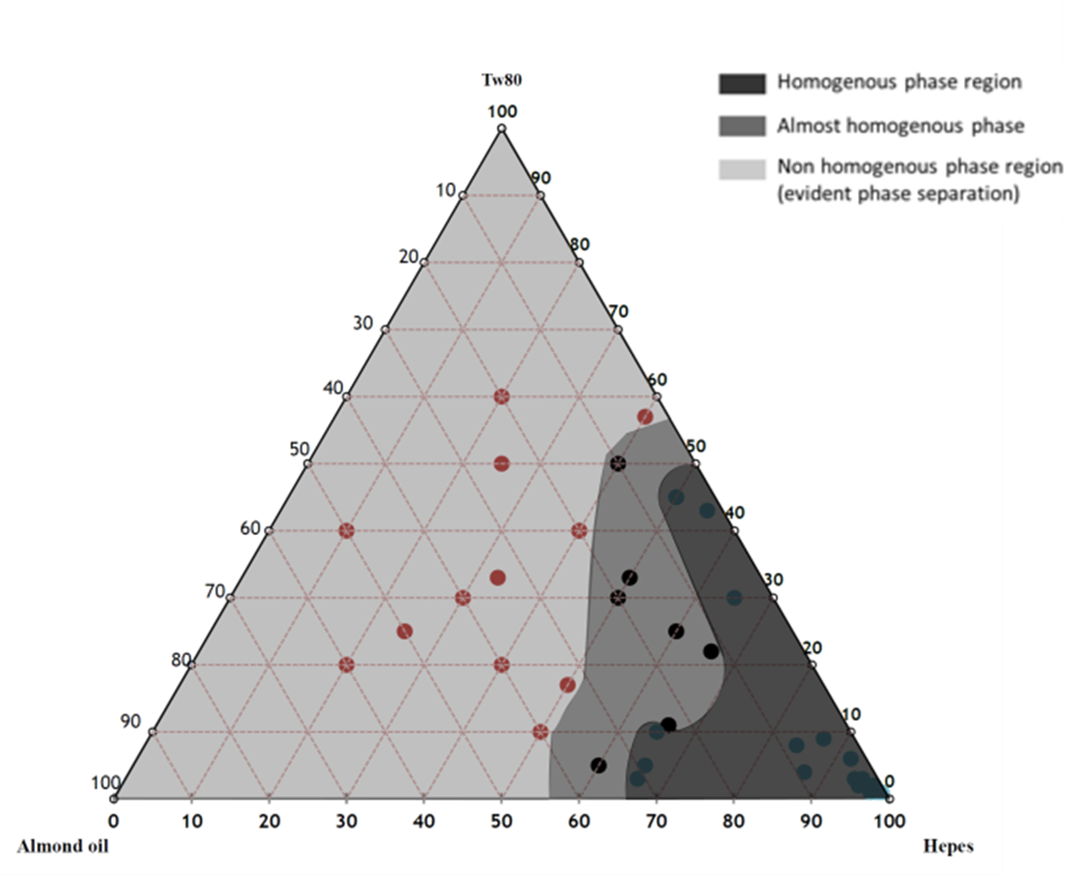
**

**Figure 2S.** Pseudo-ternary phase diagram of Almond Oil formulations

**Table 2S.** Tested Neem Oil formulations (in bold formulation in the homogeneous region, Figure 3S)

| **Sample** | **Neem Oil**  **(g)** | **Tw80**  **(g)** | **Hepes**  **(g)** | **Neem oil**  **(% w/w)** | **Tw80**  **(% w/w)** | **Hepes**  **(% w/w)** |
| --- | --- | --- | --- | --- | --- | --- |
| N1 | 0.098 | 0.147 | 5.000 | 2.00 | 3.00 | 95.00 |
| N2 | 0.098 | 0.147 | 0.100 | 28.00 | 43.00 | 29.00 |
| N3 | 0.098 | 0.147 | 0.150 | 25.00 | 37.00 | 38.00 |
| N4 | 0.098 | 0.147 | 0.300 | 18.00 | 27.00 | 55.00 |
| **N5** | **0.098** | **0.147** | **0.500** | **13.20** | **19.80** | **67.00** |
| **N6** | **0.098** | **0.147** | **1.000** | **8.00** | **12.00** | **80.00** |
| **N7** | **0.098** | **0.147** | **2.000** | **4.40** | **6.60** | **89.00** |
| **N8** | **0.098** | **0.147** | **3.000** | **3.00** | **4.50** | **92.50** |
| **N9** | **0.098** | **0.147** | **4.000** | **2.30** | **3.50** | **94.20** |
| N10 | 0.098 | 0.147 | 0.050 | 33.00 | 50.00 | 17.00 |
| **N11** | **0.098** | **0.147** | **10.000** | **1.00** | **1.50** | **97.50** |
| N12 | 0.100 | 0.400 | 0.450 | 10.50 | 42.10 | 47.40 |
| N13 | 0.100 | 0.400 | 1.000 | 7.00 | 27.00 | 66.00 |
| N14 | 0.150 | 0.200 | 0.650 | 15.00 | 20.00 | 65.00 |
| **N15** | **0.100** | **0.070** | **3.500** | **2.80** | **1.90** | **95.30** |
| **N16** | **0.100** | **0.050** | **3.500** | **2.70** | **1.40** | **95.90** |
| N17 | 0.200 | 0.150 | 0.650 | 20.00 | 15.00 | 65.00 |
| N18 | 0.180 | 0.270 | 0.550 | 18.00 | 27.00 | 55.00 |
| **N19** | **0.200** | **0.100** | **2.000** | **8.70** | **4.30** | **87.00** |
| N20 | 0.270 | 0.130 | 0.600 | 27.00 | 13.00 | 60.00 |
| **N21** | **0.400** | **0.100** | **0.500** | **40.00** | **10.00** | **50.00** |
| N22 | 0.100 | 0.200 | 0.400 | 14.00 | 29.00 | 57.00 |
| N23 | 0.150 | 0.100 | 0.250 | 30.00 | 20.00 | 50.00 |
| N24 | 0.100 | 0.150 | 0.750 | 10.00 | 15.00 | 75.00 |
| **N25** | **0.050** | **0.150** | **0.800** | **5.00** | **15.00** | **80.00** |
| **N26** | **0.200** | **0.100** | **0.700** | **20.00** | **10.00** | **70.00** |
| N27 | 0.300 | 0.050 | 0.650 | 30.00 | 5.00 | 65.00 |
| N28 | 0.200 | 0.200 | 0.600 | 20.00 | 20.00 | 60.00 |
| N29 | 0.050 | 0.250 | 0.700 | 5.00 | 25.00 | 70.00 |
| N30 | 0.040 | 0.210 | 0.750 | 4.00 | 21.00 | 75.00 |
| **N31** | **0.200** | **0.140** | **0.660** | **20.00** | **14.00** | **66.00** |
| **N32** | **0.400** | **0.040** | **0.560** | **40.00** | **4.00** | **56.00** |
| **N33** | **0.400** | **0.040** | **0.360** | **50.00** | **5.00** | **45.00** |
| **N34** | **0.400** | **0.031** | **0.190** | **65.00** | **5.00** | **30.00** |
| **N35** | **0.050** | **0.150** | **0.800** | **5.00** | **15.00** | **80.00** |

**
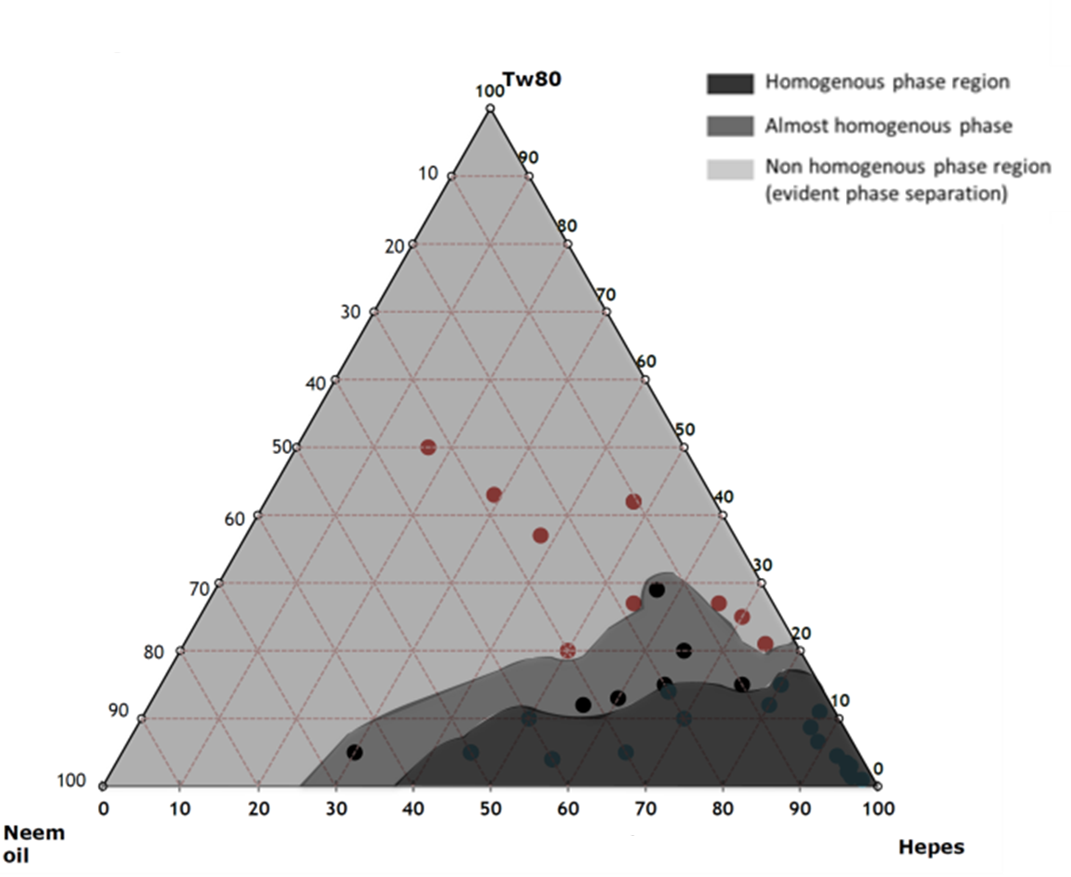
**

**Figure 3S.** Pseudo-ternary phase diagram of Neem Oil formulations

**Table 3S.** Sample features (in bold formulations tested in vitro and in vivo)

| **Sample** | **Hydrodynamic diameter (nm) ± SD** | **ζ-Potential (mV) ± SD** | **PDI** |
| --- | --- | --- | --- |
| **N** | **808.80 ± 11.6** | **-32.8 ± 1.0** | **0.3** |
| **N1** | **73.4 ± 7.6** | **-16.2 ± 0.5** | **0.4** |
| **N1E** | **174.2 ± 8.4** | **-11.1 ± 0.2** | **0.2** |
| N2 | 72.2 ± 9.5 | -14.6 ± 0.7 | 0.4 |
| N2E | 165.6 ± 9.8 | -8.6 ± 0.4 | 0.3 |
| **A** | **202.0 ± 10.8** | **-17.0 ± 0.6** | **0.3** |
| **A1** | **114.1 ± 3.8** | **-6.8 ± 0.2** | **0.4** |
| **A1E** | **266.2 ± 7.1** | **-10.1 ± 0.5** | **0.2** |
| A2 | 97.3 ± 2.0 | -6.5 ± 1.1 | 0.4 |
| A2E | 206.4 ± 1.9 | -5.7 ± 0.6 | 0.3 |

**Figure 4S.** *In vitro* release study.


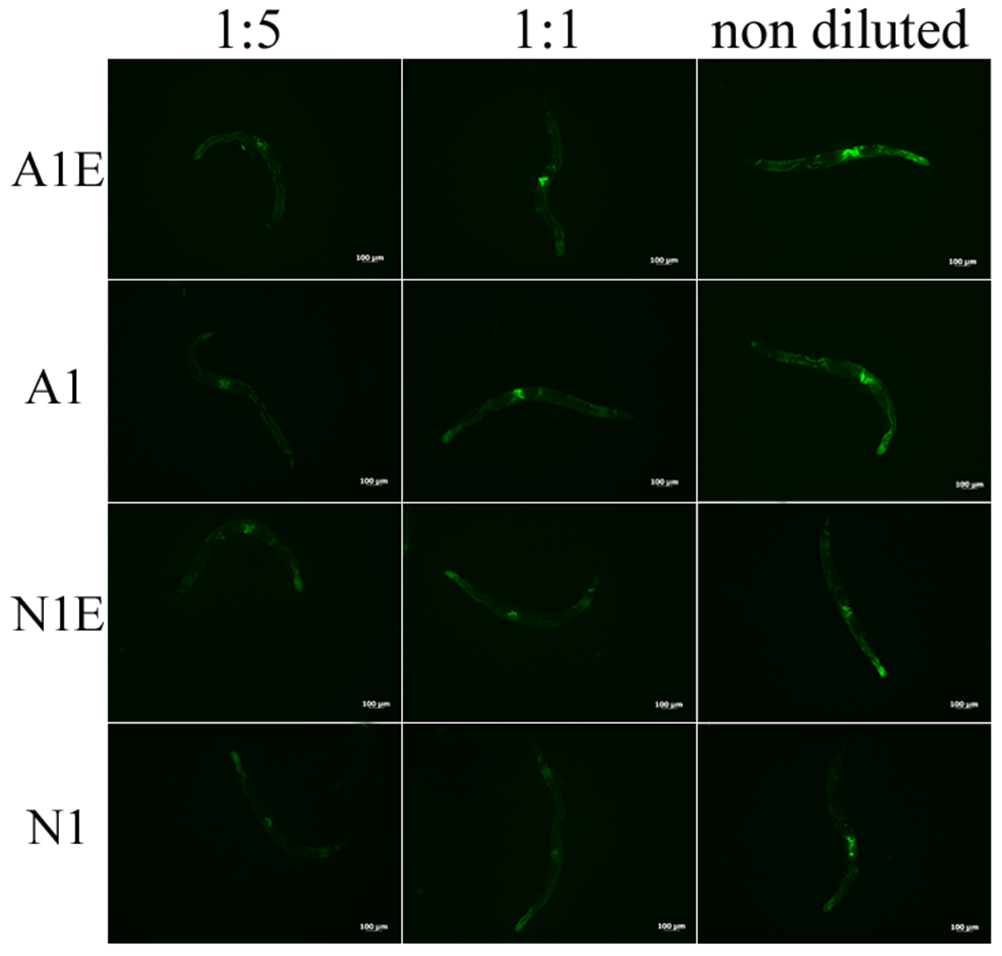


**Figure 5S. Analysis of oxidative stress responses in transgenic *sod-3*::GFP nematodes.** Fluorescence microscopy of *sod-3*::GFP worm strain at the stage of 13 day adult fed heat killed OP50 supplemented with A1E, A1, N1E and N1 nanoemulsions at different dilutions. Scale bar = 100 μm.
